# Supplementary material for: CuCo2S4 nanoparticles synthesized via a thermal decomposition approach: evaluation of their potential as peroxidase mimics
Source: Royal Society of Chemistry journal article supplement (doi:10.1039/d4nr02215g), 2024-01-01
Supplement: d4nr02215g1.pdf [file d4nr02215g1.pdf]

## **Supplementary Information**

### **CuCo<sub>2</sub>S<sub>4</sub> nanoparticles synthesized via a thermal decomposition approach: evaluation of their potential as peroxidase mimics**

Nainy Khera and Pethaiyan Jeevanandam\*

Department of Chemistry, Indian Institute of Technology Roorkee, Roorkee-247667, India.

\*E-mail: jeevafcy@iitr.ac.in; Fax: +91-1332-273560; Tel: +91-1332-285444

**The key points and precautions to be taken care of during the synthesis of CuCo<sub>2</sub>S<sub>4</sub> nanoparticles are as follows:**

1. Reaction should be carried out using a silicon oil bath inside a fume hood.
2. Metal salts and thiourea should be taken in exact stoichiometric ratio and well dispersed via sonication for at least 3 minutes.
3. The reaction temperature should be maintained at 200 °C during the entire course of reaction.
4. Proper safety gloves and mask should be worn while performing the reaction.
5. All the organic waste solvent left after washing the precipitate (diphenyl ether, methanol) should be properly disposed or recycled.

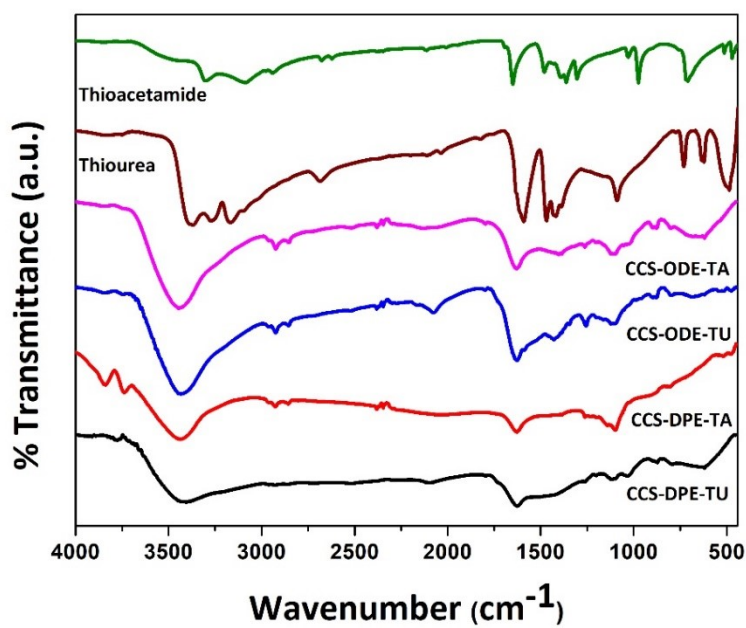

**Fig. S1:** FT-IR spectra of CuCo<sub>2</sub>S<sub>4</sub> nanoparticles.

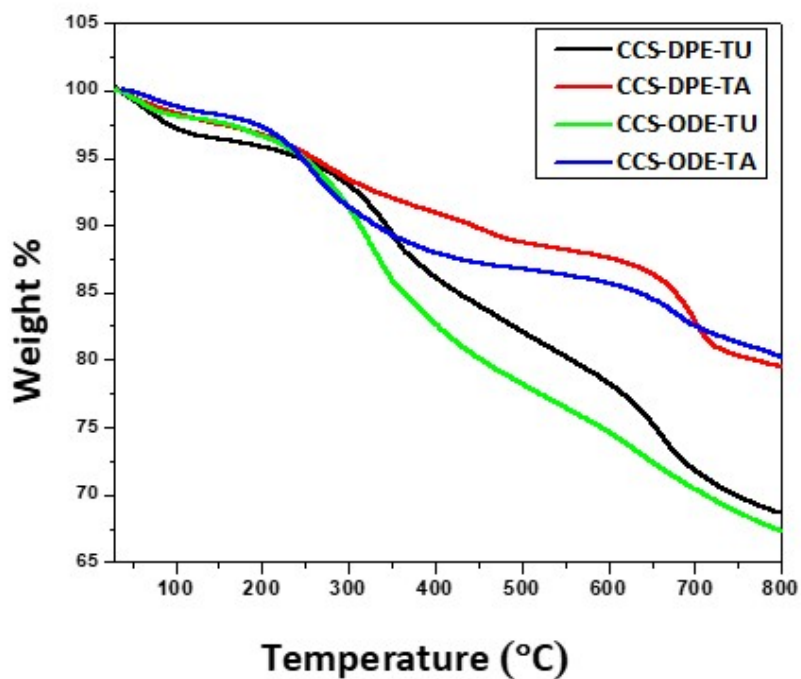

**Fig. S2:** TGA curves of CuCo<sub>2</sub>S<sub>4</sub> nanoparticles.

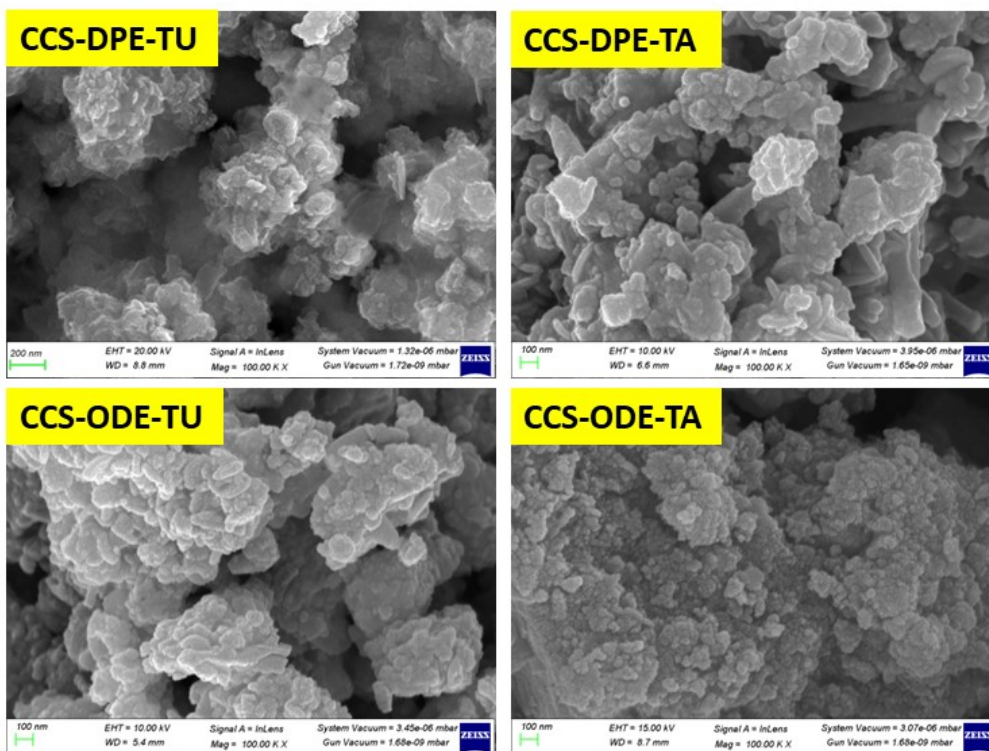

**Fig. S3:** FESEM images of  $\text{CuCo}_2\text{S}_4$  nanoparticles.

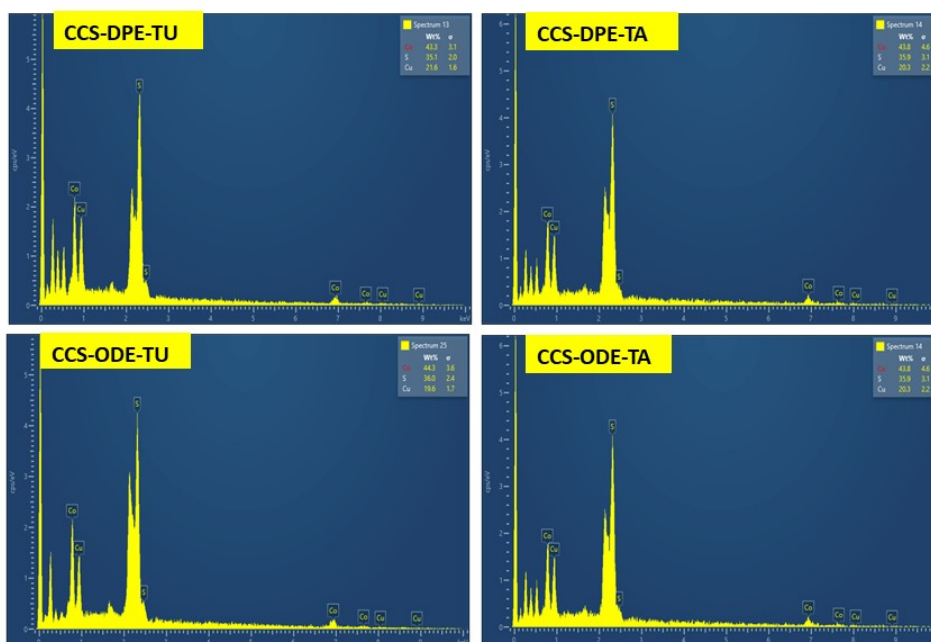

**Fig. S4:** EDS spectra of  $\text{CuCo}_2\text{S}_4$  nanoparticles.

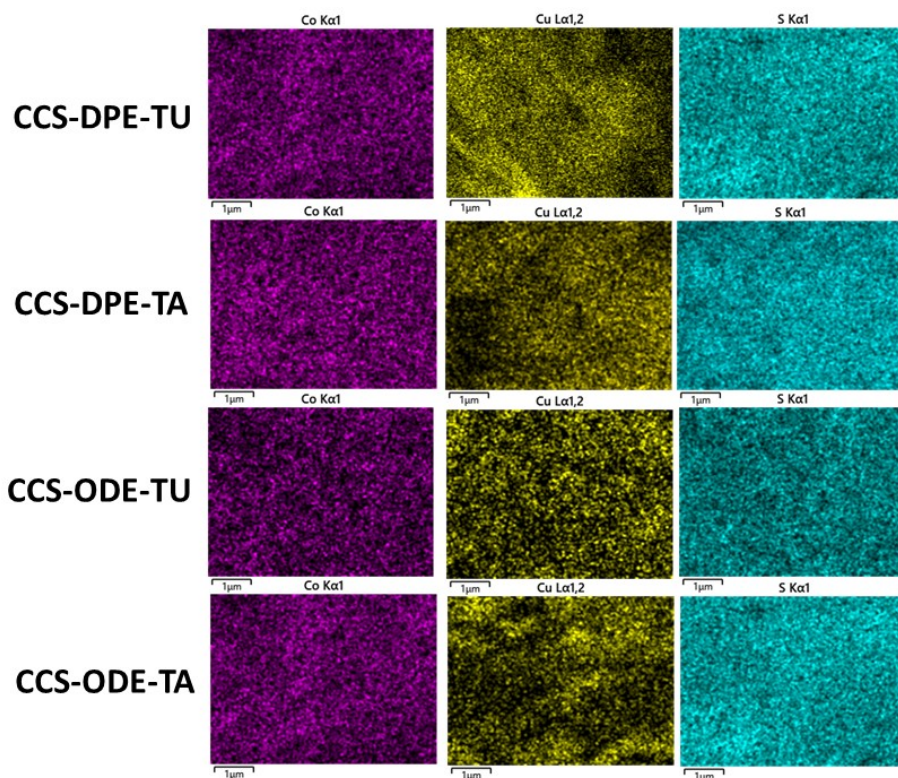

Fig. S5: Elemental mapping images of  $\text{CuCo}_2\text{S}_4$  nanoparticles.

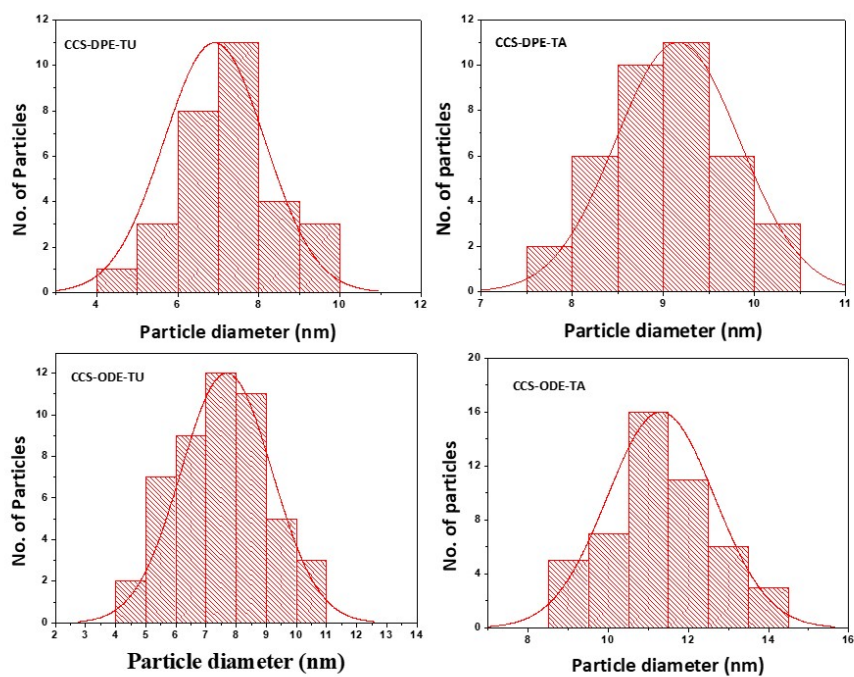

Fig. S6: Particle size histograms of  $\text{CuCo}_2\text{S}_4$  nanoparticles.

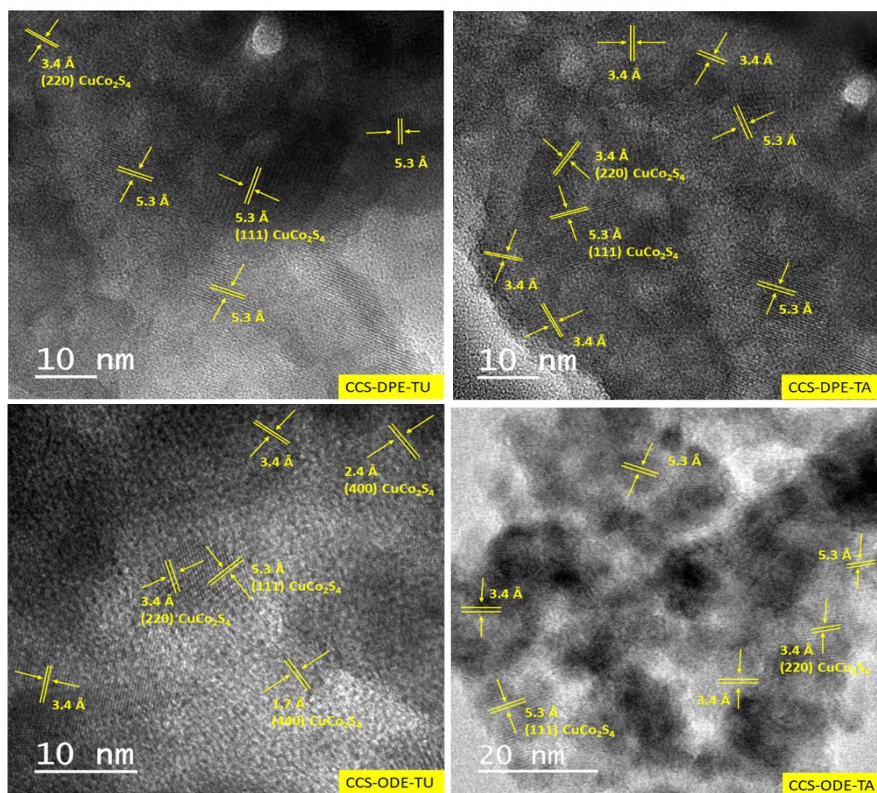

Fig. S7: HRTEM images of  $\text{CuCo}_2\text{S}_4$  nanoparticles.

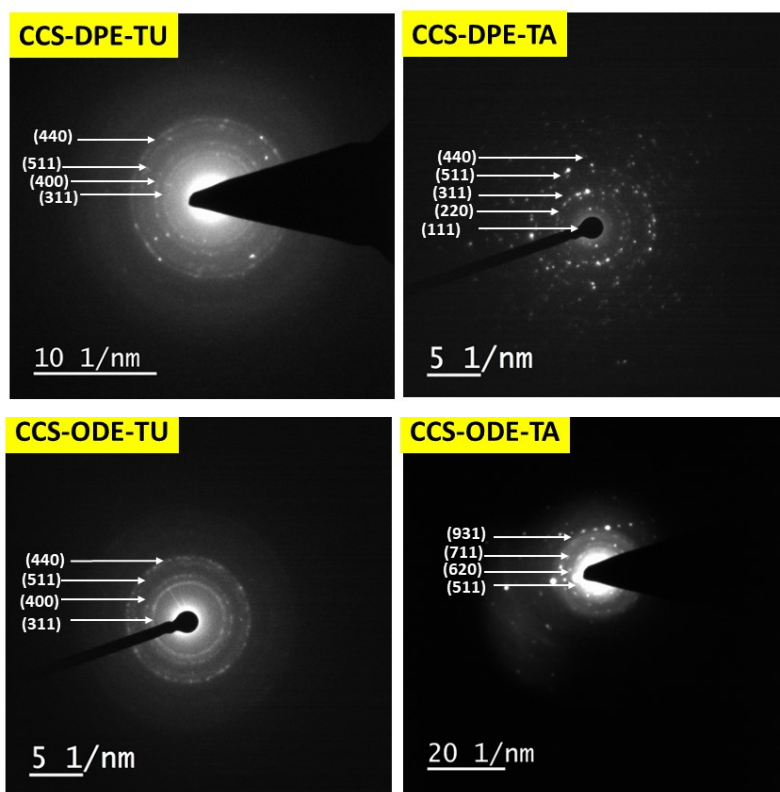

Fig. S8: SAED patterns of  $\text{CuCo}_2\text{S}_4$  nanoparticles.

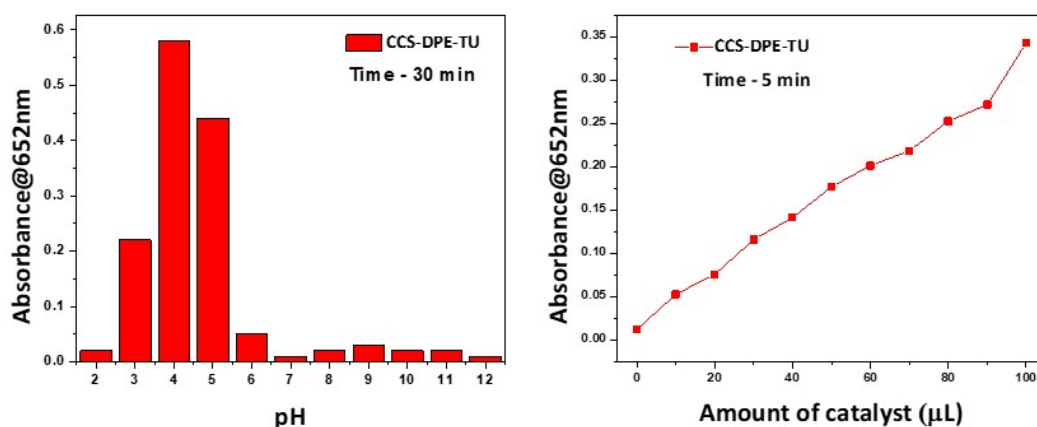

**Fig. S9:** Effect of experimental conditions on peroxidase-like activity of  $\text{CuCo}_2\text{S}_4$  nanoparticles; (a) pH and (b) amount of catalyst.

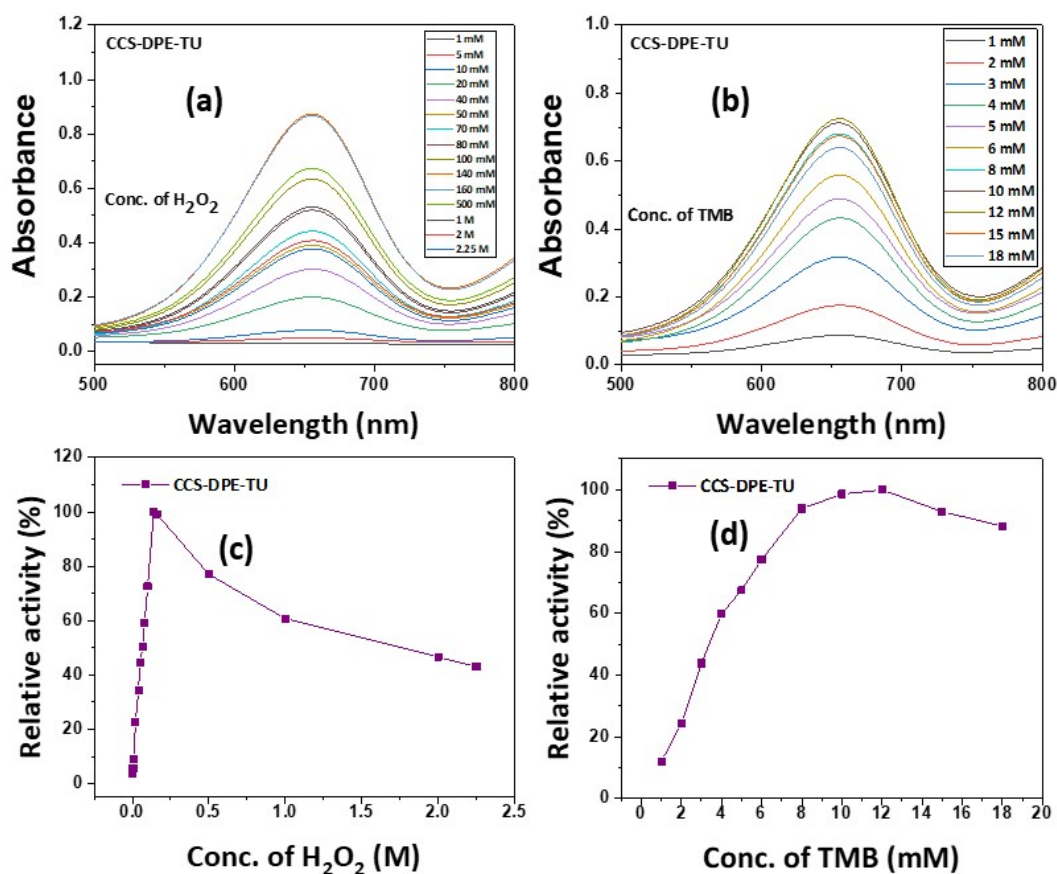

**Fig. S10:** Effect of concentration of  $\text{H}_2\text{O}_2$  and TMB on peroxidase-like activity of  $\text{CuCo}_2\text{S}_4$  nanoparticles (CCS-DPE-TU): (a,b) absorbance vs wavelength graphs for  $\text{H}_2\text{O}_2$  and TMB, and (c,d) relative activity vs concentration graphs for  $\text{H}_2\text{O}_2$  and TMB, respectively.

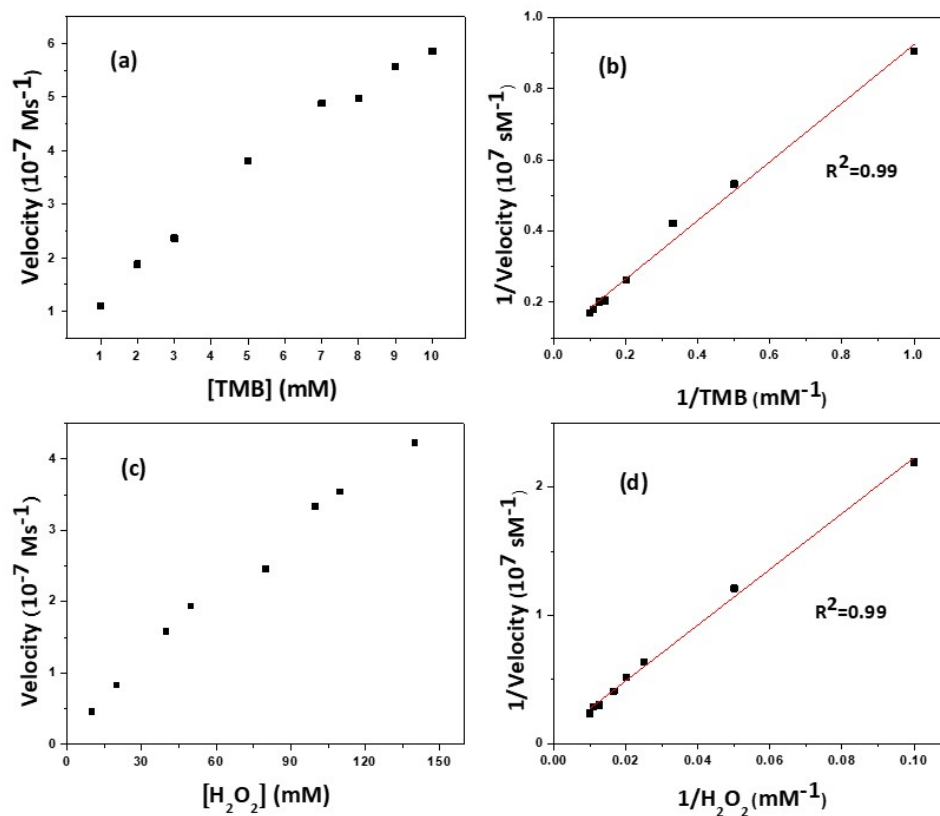

**Fig. S11:** Steady-state kinetics results of  $\text{CuCo}_2\text{S}_4$  nanoparticles (CCS-DPE-TU): (a,c) Michaelis-menton curves using TMB and  $\text{H}_2\text{O}_2$  as substrates, (b,d) corresponding Lineweaver-Burk double reciprocal plots.

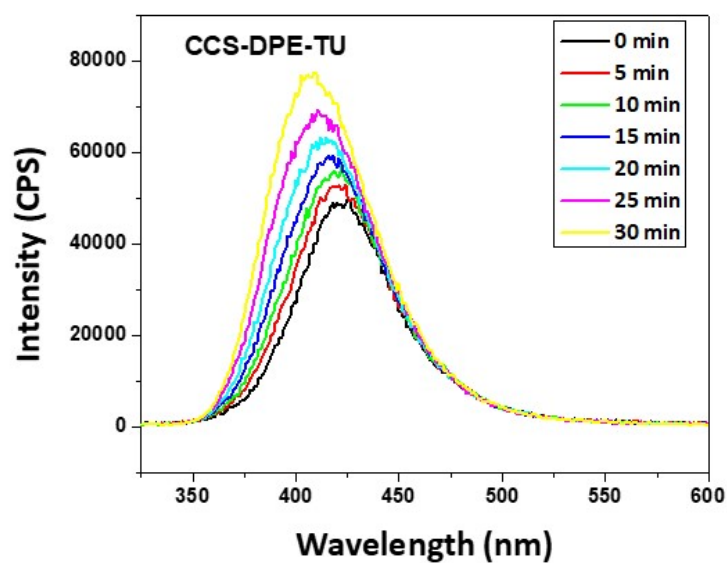

**Fig. S12:** Fluorescence spectra showing the formation of hydroxyl radicals during the oxidation of TMB by  $\text{CuCo}_2\text{S}_4$  nanoparticles (CCS-DPE-TU) ( $\lambda_{\text{exc}} = 315 \text{ nm}$ ).

**Table S1:** FT-IR spectral results ( $\text{cm}^{-1}$ ) of pure thiourea, thioacetamide and  $\text{CuCo}_2\text{S}_4$  nanoparticles along with assignment.

| Thiourea | Thioacetamide | CCS-DPE-TU | CCS-DPE-TA | CCS-ODE-TU | CCS-ODE-TA | Assignment                           |
|----------|---------------|------------|------------|------------|------------|--------------------------------------|
| 3369     | 3301          | 3432       | 3436       | 3434       | 3438       | $\nu_{\text{asym}}(\text{O-H})$      |
| 3272     | 3093          | –          | –          | –          | –          | $\nu_{\text{asym}}(\text{N-H})$      |
| 3168     | –             | –          | –          | –          | –          | $\nu_{\text{sym}}(\text{N-H})$       |
| –        | 2941          | 2927       | 2924       | 2927       | 2923       | $\nu_{\text{asym}}(\text{C-H})$      |
| –        | 2782          | 2845       | 2849       | 2852       | 2849       | $\nu_{\text{sym}}(\text{C-H})$       |
| –        | 1649          | –          | –          | –          | –          | $\delta(\text{N-H})$                 |
| 1618     | –             | 1630       | 1628       | 1624       | 1629       | $\delta(\text{O-H})$                 |
| 1428     | 1389          | --         | --         | 1412       | 1396       | $\delta(\text{C-H})$                 |
| 1329     | 1304          | 1261       | 1265       | 1259       | 1261       | $\nu_{\text{asym}}(\text{C=S})$      |
| –        | –             | 1102       | 1098       | 1108       | 1107       | $\nu_{\text{asym}}(\text{Co-S})$     |
| 1088     | –             | 1037       | –          | 1007       | 1015       | $\nu_{\text{asym}}(\text{C-N})$      |
| –        | 975           | 875        | 873        | 882        | 880        | $\delta(\text{C=S})$                 |
| 730      | 708           | –          | –          | –          | –          | $\delta_{\text{asym}}(\text{N-C-S})$ |
| 633      | –             | –          | –          | –          | –          | $\delta_{\text{asym}}(\text{N-C-N})$ |
| –        | –             | 611        | 594        | 613        | 615        | $\nu(\text{Cu-S})$                   |
| 485      | 478           | –          | –          | –          | –          | $\delta_{\text{sym}}(\text{N-C-S})$  |
| –        | –             | 458        | 461        | 470        | 468        | $\nu_{\text{sym}}(\text{Co-S})$      |



**Table S2:** EDX analysis results of  $\text{CuCo}_2\text{S}_4$  nanoparticles. The analysis was done at three different spots for each sample.

| Sample code |       | Element |      |      | Stoichiometric formula            |
|-------------|-------|---------|------|------|-----------------------------------|
|             |       | Cu      | Co   | S    |                                   |
| CCS-DPE-TU  | Wt. % | 20.9    | 42.9 | 36.1 | $\text{CuCo}_{2.4}\text{S}_{3.6}$ |
|             | At. % | 15.0    | 33.3 | 51.6 |                                   |
|             | Wt. % | 21.2    | 43.8 | 34.9 |                                   |
|             | At. % | 15.2    | 34.6 | 50.2 |                                   |
|             | Wt. % | 21.4    | 43.9 | 34.7 |                                   |
|             | At. % | 15.4    | 34.8 | 50.1 |                                   |
| CCS-DPE-TA  | Wt. % | 19.6    | 44.3 | 36.0 | $\text{CuCo}_{2.3}\text{S}_{3.7}$ |
|             | At. % | 14.2    | 34.4 | 51.4 |                                   |
|             | Wt. % | 20.9    | 42.0 | 36.9 |                                   |
|             | At. % | 15.0    | 32.5 | 52.5 |                                   |
|             | Wt. % | 21.3    | 41.8 | 36.8 |                                   |
|             | At. % | 15.2    | 32.4 | 52.4 |                                   |
| CCS-ODE-TU  | Wt. % | 20.7    | 45.0 | 34.6 | $\text{CuCo}_{2.5}\text{S}_{3.5}$ |
|             | At. % | 14.7    | 35.6 | 49.6 |                                   |
|             | Wt. % | 19.9    | 46.7 | 33.4 |                                   |
|             | At. % | 14.6    | 36.9 | 48.5 |                                   |
|             | Wt. % | 19.5    | 46.0 | 34.6 |                                   |
|             | At. % | 14.2    | 36.0 | 49.8 |                                   |
| CCS-ODE-TA  | Wt. % | 20.6    | 44.7 | 34.7 | $\text{CuCo}_{2.4}\text{S}_{3.6}$ |
|             | At. % | 14.9    | 35.1 | 49.9 |                                   |
|             | Wt. % | 21.0    | 43.5 | 35.5 |                                   |
|             | At. % | 15.2    | 33.9 | 50.9 |                                   |
|             | Wt. % | 20.1    | 45.0 | 34.9 |                                   |
|             | At. % | 14.6    | 35.2 | 50.2 |                                   |

**Table S3:** The surface area and particle size data for CuCo<sub>2</sub>S<sub>4</sub> nanoparticles.

| Sample code | Particle size (nm) | Surface area (m <sup>2</sup> /g) |
|-------------|--------------------|----------------------------------|
| CCS-DPE-TU  | 6.9 ± 1.2          | 33                               |
| CCS-DPE-TA  | 9.1 ± 0.7          | 19                               |
| CCS-ODE-TU  | 7.6 ± 1.5          | 30                               |
| CCS-ODE-TA  | 11.3 ± 1.3         | 13                               |

**Table S4:** Comparison of kinetic parameters for peroxidase-like activity of CuCo<sub>2</sub>S<sub>4</sub> nanoparticles with those reported in literature for metal sulfide nanoparticles.

| Catalyst                             | K <sub>m</sub> (mM) |                               | V <sub>max</sub> (Ms <sup>-1</sup> ) |                               | Ref.      |
|--------------------------------------|---------------------|-------------------------------|--------------------------------------|-------------------------------|-----------|
|                                      | TMB                 | H <sub>2</sub> O <sub>2</sub> | TMB                                  | H <sub>2</sub> O <sub>2</sub> |           |
| Co <sub>3</sub> S <sub>4</sub> NPs   | 0.15                | 58.3                          | 3.3×10 <sup>-7</sup>                 | 3.3×10 <sup>-7</sup>          | [30]      |
| Co <sub>9</sub> S <sub>8</sub> NPs   | 1.64                | 7.39                          | 99×10 <sup>-8</sup>                  | 35×10 <sup>-8</sup>           | [31]      |
| CuCo <sub>2</sub> S <sub>4</sub> NPs | 0.384               | 2.19                          | 2.05×10 <sup>-8</sup>                | 3.77×10 <sup>-8</sup>         | [43]      |
| NiCo <sub>2</sub> S <sub>4</sub> NPs | 0.3                 | 4.5                           | 34.86×10 <sup>-8</sup>               | 4.32×10 <sup>-8</sup>         | [68]      |
| CuS NPs                              | 0.0072              | 12                            | 8.96×10 <sup>-8</sup>                | 2.09×10 <sup>-7</sup>         | [71]      |
| CuS NPs                              | 0.064               | 1.753                         | 76.4×10 <sup>-8</sup>                | 23.7×10 <sup>-8</sup>         | [72]      |
| CuS NPs                              | 0.106               | 3.937                         | 5.3×10 <sup>-8</sup>                 | 2.139×10 <sup>-8</sup>        | [73]      |
| FeS <sub>2</sub> NPs                 | 0.17                | 0.30                          | 3.93×10 <sup>-8</sup>                | 5.67×10 <sup>-8</sup>         | [74]      |
| FeS NPs                              | 0.008               | 7.67                          | 1.07×10 <sup>-8</sup>                | 2.07×10 <sup>-8</sup>         | [75]      |
| CoS NPs                              | 0.41                | 0.26                          | 8.45×10 <sup>-8</sup>                | 0.61×10 <sup>-8</sup>         | [76]      |
| VS <sub>2</sub> NPs                  | 0.28                | 3.49                          | 41.6×10 <sup>-8</sup>                | 55.7×10 <sup>-8</sup>         | [77]      |
| MoS <sub>2</sub> NPs                 | 0.54                | 2.81                          | 3.88×10 <sup>-8</sup>                | 8.01×10 <sup>-8</sup>         | [78]      |
| MoS <sub>2</sub> NPs                 | 2.53                | 0.135                         | 58.9×10 <sup>-8</sup>                | 28.4×10 <sup>-8</sup>         | [79]      |
| WS <sub>2</sub> NPs                  | 1.83                | 0.24                          | 4.31×10 <sup>-8</sup>                | 4.52×10 <sup>-8</sup>         | [80]      |
| NiS NPs                              | 0.241               | 0.347                         | 5.09×10 <sup>-8</sup>                | 5.34×10 <sup>-8</sup>         | [81]      |
| CuS NPs                              | 0.034               | 0.028                         | 2.92×10 <sup>-8</sup>                | 19.87× 10 <sup>-7</sup>       | [82]      |
| HRP                                  | 0.434               | 3.7                           | 10×10 <sup>-8</sup>                  | 8.71× 10 <sup>-8</sup>        | [83]      |
| CuCo <sub>2</sub> S <sub>4</sub> NPs | 0.0008              | 0.0194                        | 9.77×10 <sup>-7</sup>                | 9.24× 10 <sup>-7</sup>        | This work |
